# Supplementary material
Source: HighWire-hosted journal article supplement (https://rapm.bmj.com/highwire/filestream/15696/field_highwire_adjunct_files/0/rapm-2020-102259supp001_data_supplement.pdf)
Supplement: rapm-2020-102259supp001_data_supplement.pdf [file rapm-2020-102259supp001_data_supplement.pdf]

### Supplemental Table 1 – Unadjusted Primary Endpoint Results

The below table reports the unadjusted primary endpoint results (no adjustment for baseline values) for Oswestry Disability Index (ODI) and Visual Analog Scale (VAS) between the arms at 3 and 6-months.

| <b>Oswestry Disability Index (ODI)</b>              | <b>Basivertebral Nerve<br/>Ablation Arm<br/>(N=66)</b> | <b>Standard Care<br/>Arm<br/>(N=74)</b> | <b>Difference<br/>Between Arms</b> | <b>P-Value</b>       |
|-----------------------------------------------------|--------------------------------------------------------|-----------------------------------------|------------------------------------|----------------------|
| <b>Baseline ODI</b> Mean, SD (Range)                | 44.7, 11.3 (30 to 76)                                  | 46.9, 11.7 (30 to 88)                   |                                    | 0.30 <sup>a</sup>    |
| <b>3-Month ODI</b>                                  | N=66 <sup>b</sup>                                      | N=74 <sup>b</sup>                       |                                    |                      |
| Mean, SD (Range) <sup>c</sup>                       | 21.0, 15.9 (0 to 62)                                   | 42.3, 15.8 (7 to 75)                    |                                    |                      |
| Mean change from baseline (95% CI)                  | -23.7 (-27.7, -19.7)                                   | -4.6 (-9.0, -0.2)                       |                                    | <0.001 <sup>d</sup>  |
| Difference from standard care arm in means (95% CI) |                                                        |                                         | -19.0 (-24.9, -13.1)               | <0.001 <sup>e</sup>  |
| <b>6-Month ODI</b>                                  | N=61 <sup>f</sup>                                      | N=72 <sup>g</sup>                       |                                    |                      |
| Mean, SD (Range) <sup>c</sup>                       | 19.1, 15.4 (0 to 56)                                   | 44.8, 14.3 (6 to 76)                    |                                    |                      |
| Mean change from baseline (95% CI)                  | -25.1 (-29.1, -21.1)                                   | -2.4 (-6.1, 1.2)                        |                                    | <0.001 <sup>d</sup>  |
| Difference from standard care arm in means (95% CI) |                                                        |                                         | -22.7 (-28.1, -17.3)               | <0.0001 <sup>e</sup> |
| <b>Baseline VAS</b> Mean, SD (Range)                | 6.7, 1.3 (4 to 10)                                     | 6.9, 1.3 (4 to 10)                      |                                    | 0.61 <sup>a</sup>    |
| <b>3-Month VAS</b>                                  | N=66 <sup>b</sup>                                      | N=51 <sup>b</sup>                       |                                    |                      |
| Mean, SD (Range) <sup>c</sup>                       | 3.2, 2.7 (0 to 10)                                     | 5.8, 2.2 (0 to 10)                      |                                    |                      |
| Mean change from baseline (95% CI)                  | -3.5 (-4.1, -2.9)                                      | -1.1 (-1.7, -0.4)                       |                                    | <0.001 <sup>d</sup>  |
| Difference from standard care arm in means (95% CI) |                                                        |                                         | -2.5 (-3.4, -1.6)                  | <0.001 <sup>e</sup>  |

| <b>6-Month VAS</b>                                  | N=60 <sup>f</sup> | N=70 <sup>g</sup>  |                   |                     |
|-----------------------------------------------------|-------------------|--------------------|-------------------|---------------------|
| Mean, SD (Range) <sup>e</sup>                       | 3.1, 2.4 (0 to 8) | 6.5, 1.8 (1 to 10) |                   |                     |
| Mean change from baseline (95% CI)                  | -3.5 (-4.1, -3.0) | -0.4 (-0.9, 0.2)   |                   | <0.001 <sup>d</sup> |
| Difference from standard care arm in means (95% CI) |                   |                    | -3.2 (-3.9, -2.4) | <0.001 <sup>e</sup> |

Abbreviations: ODI, Oswestry Disability Index; SD, standard deviation; CI, confidence interval

<sup>a</sup>P-value from a two-sample t-test with a factor of treatment group. Testing between randomized arms.

<sup>b</sup>Multiple imputation used to impute missing values. Values have been adjusted for multiple imputation.

<sup>c</sup>Summary statistics represent average values, obtained by averaging the summary statistics generated from each imputed dataset.

<sup>d</sup>P-value from a paired t-test on the RF Ablation Arm.

<sup>e</sup>Estimates and p-value from an ANOVA with a factor of treatment group.

<sup>f</sup>As observed. No imputations for missing values.

<sup>g</sup>Standard care control arm 6-month last attended visit (median of 176.5 days). No imputations for missing data.

Note: Visits are computed as post-treatment for the RF Ablation Arm, and post-randomization for the Control Arm.
